# Supplementary material for: Training for Marathons during a Marathon Pandemic: Effect of the COVID-19 Pandemic on Fitness among High-Level Nonelite Runners
Source: Hindawi journal article supplement (doi:10.1155/2021/9682520), 2021-10-05
Supplement: f1 [file 9682520.f1.pdf]

**Dear Runners,**

**On behalf of the MASTERS Athletic Survey we thank you for taking the time to participate in our survey.**

**We are interested in the effects of the COVID-19 pandemic on health and training habits of runners like you.**

**The study consists of 20 questions and should take less than 5 minutes to complete. You may leave your email address at the end of the survey if you would like a copy of the aggregate results.**

**Please note that this survey is for research purposes only; in no way does it constitute a medical evaluation or medical advice. Your answers will remain anonymous and will not be shared with any outside entities.**

**If you are over age 18 and run regularly we welcome you to participate in our survey.**

**This study has been approved by the institutional review board of Geisinger Health System. If you have questions please contact the study investigator at [mmatsumura@geisinger.edu](mailto:mmatsumura@geisinger.edu)**

1. What is your age?

18-24

45-49

25-29

50-54

30-34

55-59

35-39

60-64

40-44

65+

2. What is your gender identity?

Female

Male

Prefer not to answer

3. For how many years have you been running for exercise and/or competitively?

- Less than 5 years
- 6-10 years
- 11-15 years
- 16-20 years
- 21-25 years
- 26-30 years
- >30 years

4. How many miles did you run in a typical week prior to the start of the COVID-19 pandemic (i.e. prior to March 2020)?

- <10
- 11-20
- 21-30
- 31-40
- 41-50
- >50

5. Since the start of the pandemic (i.e. March 2020) how many miles do you run in a typical week?

- <10
- 11-20
- 21-30
- 31-40
- 41-50
- >50

6. Prior to the COVID-19 pandemic what was your typical training pace (the pace at which you did most of your runs)?

- |                                        |                                          |
|----------------------------------------|------------------------------------------|
| <input type="radio"/> <6 minutes/mile  | <input type="radio"/> 9-10 minutes/mile  |
| <input type="radio"/> 6-7 minutes/mile | <input type="radio"/> 10-11 minutes/mile |
| <input type="radio"/> 7-8 minutes/mile | <input type="radio"/> 11-12 minutes/mile |
| <input type="radio"/> 8-9 minutes/mile | <input type="radio"/> >12 minutes/mile   |

7. Since the start of the pandemic (i.e. March 2020) what is your typical training pace?

- <6 minutes/mile
- 6-7 minutes/mile
- 7-8 minutes/mile
- 8-9 minutes/mile
- 9-10 minutes/mile
- 10-11 minutes/mile
- 11-12 minutes/mile
- >12 minutes/mile

8. Do you participate in other endurance activities besides running (check all that apply)?

- Cycling
- Swimming
- Weights
- Other cross training
- I do not do any training other than running

9. How would you compare your fitness currently vs. prior to the pandemic?

- Much better
- Better
- About the same
- Worse
- Much worse
- Unsure

10. Have you ever tested positive for COVID-19?

- Yes
- No

Copy of Study of the Effects of the COVID-19 Pandemic on Runners

11. Approximately when were you diagnosed with COVID-19?

- Within the past month
- In the past 1-3 months
- In the past 4-6 months
- More than 6 months ago

12. Did you have symptoms at or around the time you were diagnosed with COVID-19?

- Yes
- No

13. Did you require an emergency room visit or hospital admission due to your COVID-19 illness?

- Yes
- No

14. Are you back to your baseline level of running fitness following your illness?

- Yes
- No

15. Which of the following are preventing your return to normal running (check all that apply)?

- Shortness of breath
- chest pain
- Muscle weakness
- General fatigue
- Dizziness
- Fast heart rate
- Depression/lack of motivation
- Other
- None of the above, back to normal running

16. How much time did you take off from running after your COVID-19 diagnosis?

- no time off
- less than 2 weeks
- 2-4 weeks
- >4 weeks

17. Do you seek a doctor's advice regarding restarting running and exercise after testing positive for COVID-19?

- Yes
- No

18. How long did your doctor advise you to refrain from exercise after testing positive for COVID-19?

- Did not recommend taking time off
- <1 week
- 1-2 weeks
- 2-4 weeks
- >4 weeks
- I did not see a doctor or get an opinion

19. Did you get any of the following test prior to resuming running (check all that apply)?

- electrocardiogram (EKG)
- stress test
- echocardiogram (heart ultrasound)
- chest x ray
- none of these

20. What was your typical resting heart rate prior to contracting COVID-19 (i.e. your heart rate upon awakening in the morning)?

- <40 beats per minute
- 40-50 beats per minute
- 50-60 beats per minute
- 60-70 beats per minute
- 70-80 beats per minute
- 80-90 beats per minute
- 90-100 beats per minute
- >100 beats per minute
- I don't know

21. What is your typical resting heart rate since contracting COVID-19?

- <40 beats per minute
- 40-50 beats per minute
- 50-60 beats per minute
- 60-70 beats per minute
- 70-80 beats per minute
- 80-90 beats per minute
- 90-100 beats per minute
- >100 beats per minute
- I don't know

22. Do you notice any of the following regarding your heart rate since your COVID-19 diagnosis (check all that apply)?

- Heart rate increases more rapidly with exercise
- Heart rate slows more slowly after completion of exercise
- Heart rate increases randomly at rest
- None of the above

23. Thank you for participating! Your answers will remain confidential. Feel free to leave an email address if you would like a copy of the results of this study to be sent to you.
